# Supplementary material
Source: MDPI journal article supplement (https://www.mdpi.com/2071-1050/12/21/9011)
Supplement: s1 [file s1]

## Article

# Circular Economy Practices among Industrial EMAS-Registered SMEs in Spain

Alexandra Barón \*, Rudi de Castro and Gerusa Giménez

Department of Business Administration, Management and Product Design, University of Girona, 17071 Girona, Spain; rudi.castro@udg.edu (R.d.C.); gerusa.gimenez@udg.edu (G.G.)

\* Correspondence: alexandra.baron@udg.edu

Received: 16 September 2020; Accepted: 20 October 2020; Published: 29 October 2020

## Supplementary Materials

Table S1. Data collection grid.

| Statement | Sector          | Economic Performance |           |         | No. Workers | 'CE' mention | Measure | Production    |              |      |      |     |      |     |     |     |     |     |     |     |     |      |      |     |     |     |     |     |     |     |     |     |
|-----------|-----------------|----------------------|-----------|---------|-------------|--------------|---------|---------------|--------------|------|------|-----|------|-----|-----|-----|-----|-----|-----|-----|-----|------|------|-----|-----|-----|-----|-----|-----|-----|-----|-----|
|           |                 | Turnover(t)**        | BN(C)**   | RE(%)** |             |              |         | Previous year | Current year | NR1* | NR2* | ER1 | RM1* | RM2 | RM3 | RM4 | RM5 | RM6 | EM1 | EM2 | EM3 | WM1* | WM2* | WM3 | WM4 | WM5 | LC1 | LC2 | LC3 | LC4 | LC5 | LC6 |
| 1         | Chemical/Farma  | 62021634             | 2195710   | 6.31    | 180         | 0            | t/a     | 31164.1       | 30150.48     | 0    | 0    | 1   | 0    | 1   | 0   | 0   | 0   | 0   | 0   | 0   | 0   | 1    | 0    | 0   | 0   | 0   | 0   | 0   | 1   | 0   | 0   | 0   |
| 2         | Chemical/Farma  | 22579936             | -78343    | -4.37   | 49          | 0            | t/a     | 13783.0       | 13037        | 0    | 0    | 0   | 0    | 1   | 0   | 0   | 0   | 0   | 0   | 0   | 0   | 0    | 0    | 0   | 0   | 0   | 0   | 0   | 0   | 0   | 0   | 0   |
| 3         | Textile         | 9012862              | 1676952   | 43.56   | 15          | 0            | tmpp/a  | 36.4          | 47.1068636   | 1    | 0    | 0   | 0    | 0   | 0   | 0   | 0   | 1   | 1   | 0   | 0   | 1    | 1    | 1   | 1   | 0   | 1   | 0   | 1   | 0   | 1   | 0   |
| 4         | Textile         | 2727791              | 196801    | 5.72    | 5           | 0            | t/a     | 25141.0       | 24385        | 1    | 1    | 0   | 1    | 0   | 0   | 0   | 0   | 0   | 0   | 0   | 0   | 1    | -    | 1   | 1   | 1   | 0   | 0   | 0   | 0   | 0   | 0   |
| 5         | Metal           | 377823               | 5763      | 1.85    | 6           | 0            | tmpp/a  | 13.0          | 12.22        | 0    | 0    | 1   | 0    | 0   | 0   | 0   | 0   | 0   | 0   | 0   | 0   | 0    | 0    | 0   | 0   | 0   | 0   | 0   | 0   | 0   | 0   | 0   |
| 6         | Plastics/Rubber | 17404117             | 4001362   | 26.24   | 44          | 0            | t/a     | 255.7         | 520.43       | 0    | 1    | 0   | 0    | 0   | 0   | 0   | 1   | 0   | 0   | 0   | 0   | 0    | 1    | 1   | 1   | 0   | 0   | 0   | 0   | 0   | 0   | 0   |
| 7         | Plastics/Rubber | 1673518              | 32255     | 2.25    | 13          | 0            | t/a     | 132.8         | 126.4        | 0    | 1    | 0   | 0    | 0   | 0   | 0   | 1   | 1   | 1   | 0   | 1   | 0    | 1    | 1   | 1   | 0   | 0   | 0   | 1   | 0   | 0   | 0   |
| 8         | Metal           | 60901370             | 1805287   | 4.38    | 99          | 1            | t/a     | 82137.0       | 77353        | 0    | 1    | 0   | 1    | 0   | 0   | 0   | 0   | 0   | 0   | 0   | 0   | 0    | 1    | 1   | 1   | 1   | 0   | 0   | 0   | 0   | 0   | 0   |
| 9         | Chemical/Farma  | 4609889              | 349552    | 11.89   | 19          | 0            | t/a     | 3608.0        | 3910         | 1    | 1    | 0   | 1    | 1   | 0   | 0   | 1   | 1   | 1   | 1   | 1   | 1    | 1    | 1   | 1   | 0   | 0   | 0   | 1   | 0   | 0   | 0   |
| 10        | Others          | 9601006              | -171042   | -2.06   | 93          | 0            | MEF     | 52807006.4    | 63511630     | 0    | 1    | 0   | 0    | 0   | 0   | 0   | 1   | 0   | 0   | 1   | 1   | 1    | 1    | 1   | 1   | 0   | 0   | 0   | 0   | 0   | 0   | 0   |
| 11        | Plastics/Rubber | 24772311             | 2008817   | 13.11   | 75          | 0            | t/a     | 27221.0       | 25749        | 1    | 1    | 0   | 1    | 1   | 0   | 0   | 1   | 1   | 1   | 1   | 1   | 1    | 1    | 1   | 1   | 0   | 0   | 0   | 0   | 0   | 0   | 0   |
| 12        | Chemical/Farma  | 31597822             | 4958146   | 33.72   | 70          | 0            | t/a     | 15346.0       | 18012        | 1    | 1    | 0   | 0    | 0   | 0   | 0   | 0   | 0   | 0   | 0   | 1   | 1    | 0    | 0   | 0   | 0   | 1   | 0   | 0   | 0   | 0   | 0   |
| 13        | Chemical/Farma  | 14919240             | 1216151   | 16.89   | 30          | 0            | t/a     | 17002.6       | 18510        | 0    | 1    | 1   | 1    | 0   | 0   | 0   | 1   | 0   | 0   | 0   | 1   | 0    | 0    | 1   | 0   | 1   | 0   | 0   | 0   | 0   | 0   | 0   |
| 14        | Others          | 162356000            | 2632000   | 3.73    | 239         | 0            | Und/a   | 11573789.0    | 11658707     | 0    | 0    | 1   | 1    | 0   | 0   | 0   | 0   | 0   | 0   | 1   | 0   | 0    | 1    | 0   | 1   | 1   | 0   | 0   | 0   | 0   | 0   | 0   |
| 15        | Textile         | 14803623             | 609339    | 7.97    | 65          | 0            | t/a     | 1769.0        | 2052         | 1    | 1    | 0   | 1    | 0   | 0   | 0   | 0   | 0   | 0   | 0   | 0   | 1    | 0    | 1   | 0   | 0   | 0   | 0   | 0   | 0   | 0   | 0   |
| 16        | Chemical/Farma  | 53024748             | -88806    | -2.56   | 139         | -            | -       | -             | -            | -    | -    | -   | -    | -   | -   | -   | -   | -   | -   | -   | -   | -    | -    | -   | -   | -   | -   | -   | -   | -   | -   |     |
| 17        | Plastics/Rubber | 52851857             | 1284282   | 3.59    | 240         | 0            | t/a     | 7097.4        | 7825.4       | 1    | 1    | 0   | 0    | 0   | 0   | 0   | 1   | 1   | 0   | 0   | 1   | 0    | 0    | 1   | 0   | 0   | 0   | 0   | 1   | 1   | 1   | 1   |
| 18        | Minerals/Wood   | 5715488              | 81785     | 1.14    | 22          | 0            | t/a     | 624.5         | 576.72       | 0    | 0    | 1   | 1    | 0   | 0   | 0   | 0   | 0   | 1   | 1   | 1   | 1    | 1    | 1   | 1   | 1   | 0   | 0   | 0   | 0   | 0   | 0   |
| 19        | Metal           | 14370546             | 432202    | 5       | 48          | 0            | tm/a    | 3111.0        | 2681         | 0    | 0    | 0   | 0    | 0   | 0   | 0   | 0   | 0   | 0   | 0   | 0   | 0    | 0    | 0   | 0   | 0   | 0   | 0   | 0   | 0   | 0   | 0   |
| 20        | Metal           | 4269648              | 163492    | 5.29    | 27          | 0            | tm/a    | 1431.0        | 1528         | 1    | 1    | 0   | 0    | 0   | 0   | 0   | 0   | 0   | 0   | 0   | 0   | 1    | 0    | 0   | 1   | 0   | 0   | 0   | 0   | 0   | 0   | 0   |
| 21        | Plastics/Rubber | 26292822             | 3574615   | 22.88   | 125         | 0            | tmpp/a  | 1617.0        | 2240         | 1    | 1    | 0   | -    | 0   | 0   | 0   | 1   | 1   | 0   | 0   | 1   | 1    | 1    | 1   | 1   | 0   | 0   | 1   | 0   | 0   | 0   | 0   |
| 22        | Metal           | 21852000             | 4232000   | 5.09    | 200         | 0            | t/a     | 62416.0       | 58621        | 1    | 0    | 1   | 0    | 0   | 0   | 0   | 1   | 0   | 1   | 0   | 1   | 0    | 0    | 0   | 0   | 0   | 1   | 1   | 0   | 1   | 0   | 1   |
| 23        | Minerals/Wood   | 16426959             | 1131923   | 15.87   | 44          | -            | -       | -             | -            | -    | -    | 1   | 0    | 0   | 0   | 1   | 1   | 0   | 0   | 1   | 0   | 1    | 1    | 1   | 1   | 1   | 1   | 1   | 1   | 1   | 1   | 1   |
| 24        | Plastics/Rubber | 51254334             | 8552188   | 33.33   | 249         | 0            | tmpp/a  | 5109.2        | 5843.670886  | 1    | 0    | 0   | -    | 0   | 0   | 0   | 0   | 1   | 0   | 1   | 1   | 1    | -    | -   | -   | 1   | 0   | 0   | 0   | 0   | 1   | 1   |
| 25        | Chemical/Farma  | 12991471             | 142881    | 1.35    | 50          | 0            | t/a     | 27885.7       | 26417.8      | 1    | 0    | 0   | 0    | 0   | 0   | 0   | 0   | 1   | 0   | 0   | 0   | 0    | 0    | 0   | 0   | 0   | 0   | 0   | 0   | 0   | 0   | 0   |
| 26        | Other           | 74301295             | 643077    | 2.41    | 66          | 0            | t/a     | 185260.0      | 185047       | 1    | 0    | 0   | 1    | 0   | 1   | 1   | 0   | 0   | 0   | 0   | 0   | 0    | 0    | 0   | 0   | 0   | 0   | 0   | 0   | 0   | 0   | 0   |
| 27        | Minerals/Wood   | 27426000             | -31295000 | -3.03   | 145         | 1            | t/a     | 1436483.0     | 1312726      | 1    | 0    | 1   | 1    | 1   | 0   | 0   | 1   | 1   | 1   | 1   | 1   | 1    | 1    | 1   | 1   | 1   | 0   | 0   | 0   | 0   | 0   | 0   |
| 28        | Chemical/Farma  | 53077384             | 1936260   | 2.17    | 200         | 0            | t/a     | 481366.0      | 503773       | 0    | 0    | 1   | 0    | 1   | 1   | 0   | 0   | 0   | 0   | 2   | 1   | 0    | 1    | 1   | 0   | 1   | 0   | 0   | 0   | 0   | 0   | 0   |
| 29        | Minerals/Wood   | 9264390              | 424702    | 4.97    | 38          | 0            | t/a     | 128345.0      | 118902       | 1    | 1    | 1   | 1    | 0   | 0   | 0   | 0   | 0   | 0   | 1   | 0   | 1    | 1    | 0   | 0   | 0   | 0   | 0   | 0   | 0   | 0   | 0   |
| 30        | Textile         | 7047097              | -160019   | -5.52   | 70          | 0            | Und/a   | 328.0         | 384          | 0    | 1    | 0   | 1    | 0   | 0   | 0   | 0   | 0   | 0   | 0   | 0   | 0    | 0    | 0   | 0   | 1   | 0   | 0   | 0   | 0   | 0   | 0   |
| 31        | Others          | 8055305              | 828884    | 5.76    | 44          | 1            | t/a     | 896.0         | 1001         | 1    | 1    | 1   | 0    | 1   | 0   | 0   | 0   | 0   | 0   | 1   | 1   | 0    | 0    | 0   | 1   | 0   | 0   | 0   | 0   | 0   | 0   | 0   |

\*See Formulas

\*\*Financial statements from SABI Database 31/12/2018

0: No/Negative 1: Yes/Positive

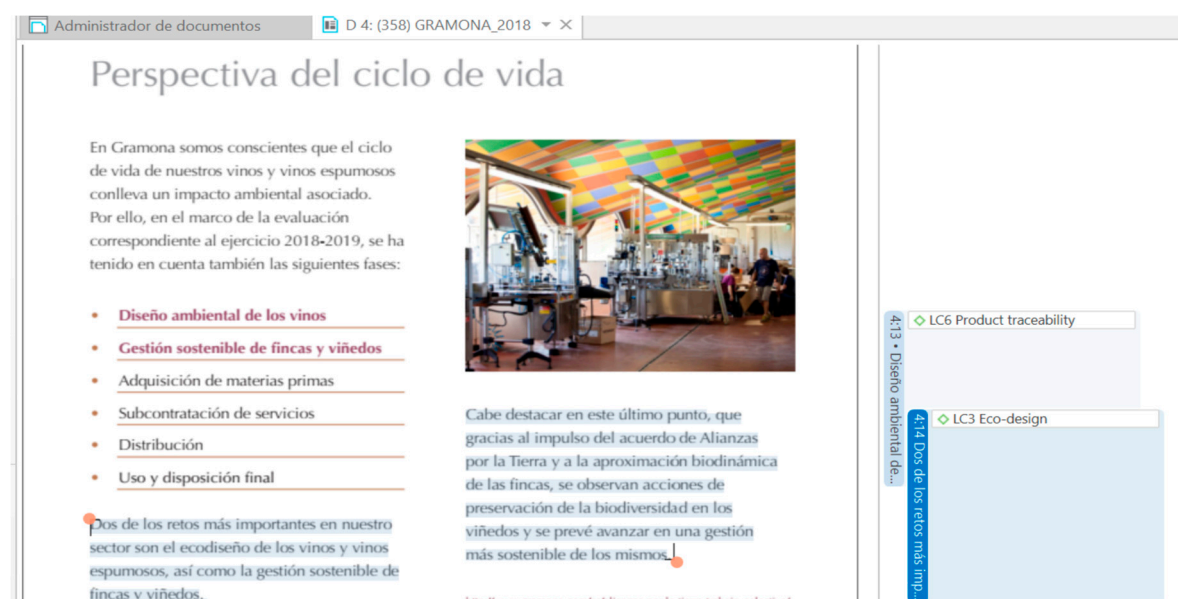

**Figure S1.** Example Codification 1 with Atlas.ti. Source: screenshot of document encoding in Atlas.ti (Version 8.4.24.9).

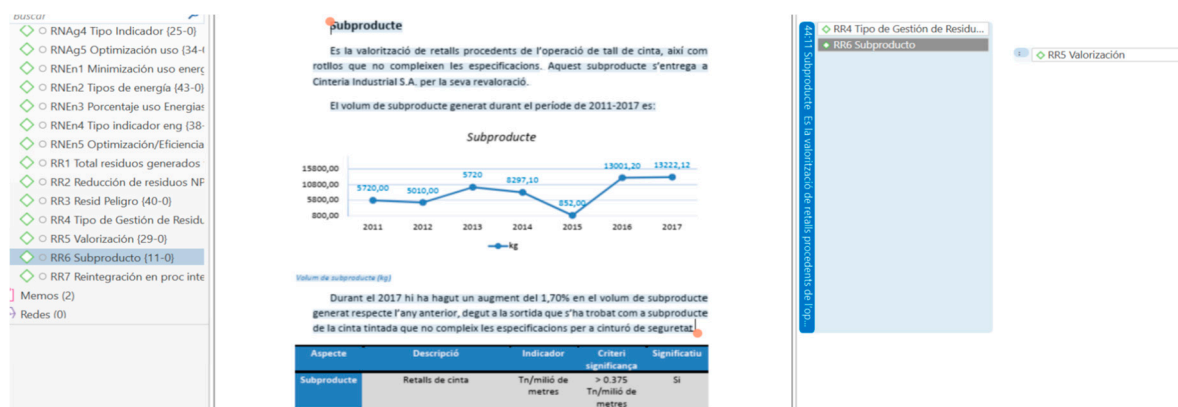

**Figure S2.** Example Codification 2 with Atlas.ti. Source: screenshot of document encoding in Atlas.ti (Version 8.4.24.9).

**Publisher's Note:** MDPI stays neutral with regard to jurisdictional claims in published maps and institutional affiliations.

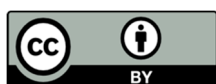

© 2020 by the authors. Submitted for possible open access publication under the terms and conditions of the Creative Commons Attribution (CC BY) license (<http://creativecommons.org/licenses/by/4.0/>).
